# Supplementary material for: CAMK2N1 inhibits prostate cancer progression through androgen receptor-dependent signaling
Source: PubMed Central journal article supplement (PMC4279373; doi:10.18632/oncotarget.2511), 2014-09-25
Supplement: oncotarget-05-10293-s001.pdf [file oncotarget-05-10293-s001.pdf]

# CAMK2N1 inhibits prostate cancer progression through androgen receptor-dependent signaling

## Supplementary Material

A

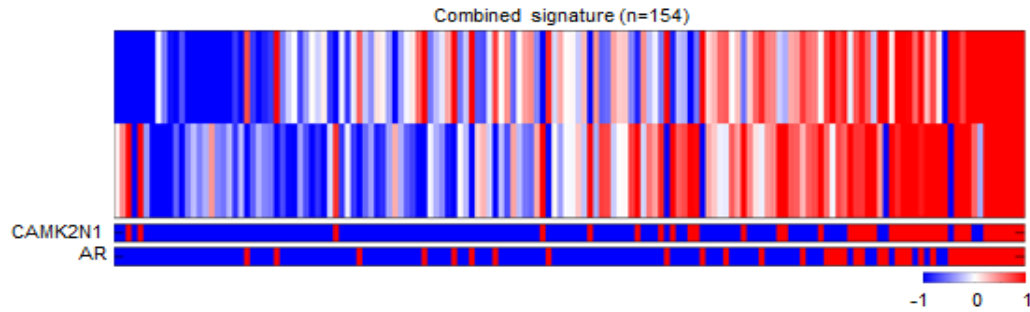

**Supplemental Figure 1: Heatmap depicting samples from combined human prostate cancer microarray datasets.** (A) Heatmap depicting samples from combined human prostate cancer microarray datasets that were assigned to prostate cancer gene expression subtypes (N = 154).

A

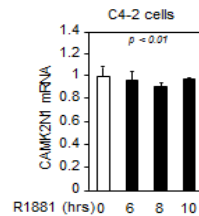

B

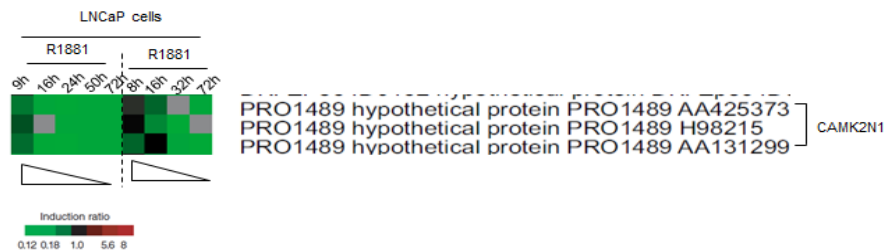

**Supplemental Figure 2: Microarray data in the public domains for effects of androgens on CAMK2N1 mRNA expression in LNCaP cell line.** (A) C4-2 cells were treated with 10 nM R1881 for 6-10 hrs. CAMK2N1 mRNA levels were determined by qRT-PCR. (B) Hierarchical cluster analysis of CAMK2N1 genes in LNCaP cells treated with R1881. CAMK2N1 mRNA levels were decreased upon androgen treatment in LNCaP cells.

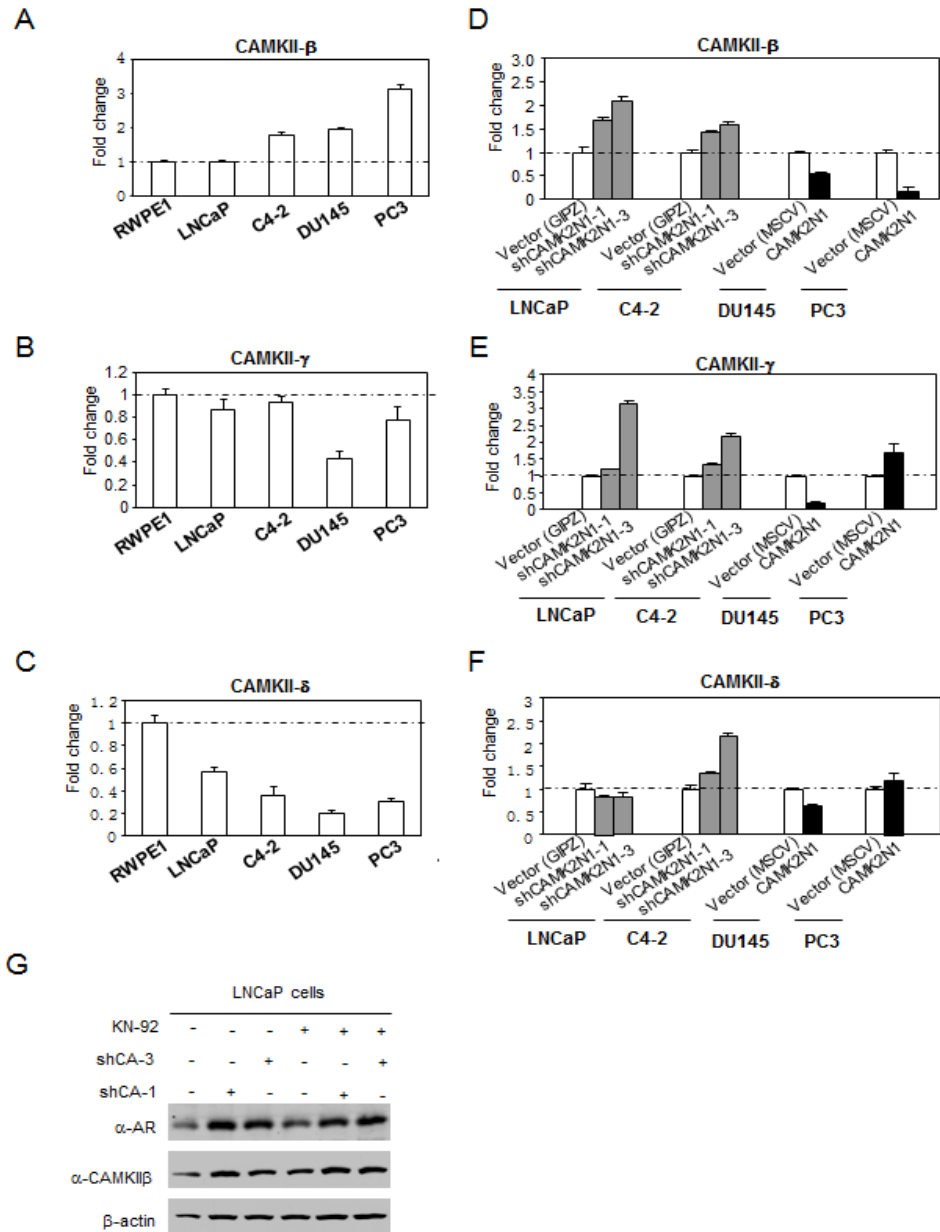

**Supplemental Figure 3: CAMKII gene expression in prostate cancer cell lines.** (A-C) qRT-PCR analysis of CAMKII mRNA levels in prostate cancer cell lines (RWPE1, LNCaP, C4-2, DU145, and PC3). RWPE1, which is normal prostate cells used as a control, showed lower expression of CAMKII $\beta$ . All of the prostate cancer cells exhibited increased expression of CAMKII $\beta$ . CaMKII $\alpha$  expression was not detected in any prostate cell lines tested (data not shown). (D-F) LNCaP and C4-2 cells stably knocked down CAMK2N1. DU145 and PC3 cells stably overexpressed CAMK2N1. qRT-PCR analysis of CAMKII mRNA levels in these prostate cancer cell lines. CAMK2N1 significantly inhibited the expression of CAMKII. (G) CAMK2N1 knockdown cells treated with 10 nM R1881 and/or 20 $\mu$ M KN-92 inhibitor. CAMKII $\beta$  and AR protein levels were determined by Western blot.

**A**

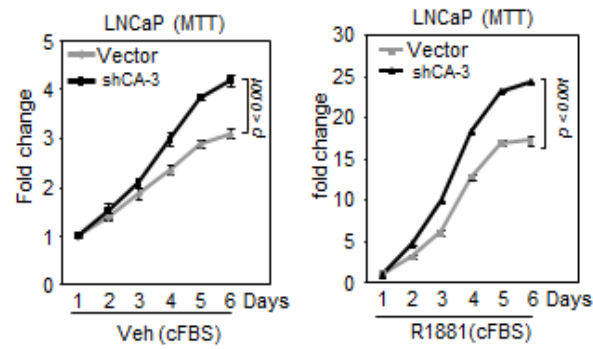

**B**

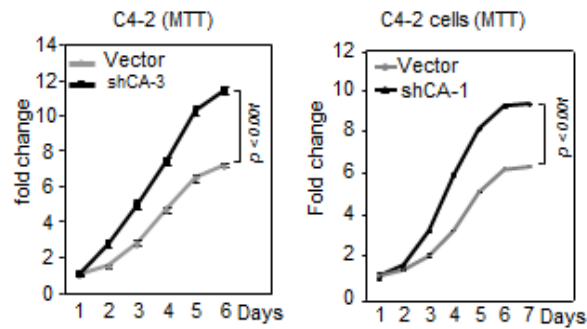

**Supplemental Figure 4: CAMK2N1 inhibits cell proliferation in LNCaP and C4-2 cells.** (A) LNCaP stably knocked down CAMK2N1 with or without R1881 treatment. Cells were analyzed for cell proliferation by MTT. (B) C4-2 cells with stable knockdown of CAMK2N1. Cells were analyzed for cell proliferation by MTT assay.
